# Supplementary material for: Sites of Peripheral Artery Occlusive Disease as a Predictor for All-Cause and Cardiovascular Mortality in Chronic Hemodialysis
Source: PLoS One. 2015 Jun 2;10(6):e0128968. doi: 10.1371/journal.pone.0128968 (PMC4452767; doi:10.1371/journal.pone.0128968)
Supplement: S1 Dataset — (XLS) [file pone.0128968.s001.xls]

## Sheet: Sheet1
time_survival	death_all	death_CVD	age	SEX	HD_time	DM	CVD	smoker	SBP	DBP	BMI	Albumin	TG	TC	KtV	CTR	Hbc	iPTH	Ferritin	Cap	RABI	LABI	ABI_location	PAOD	Cardiomegaly	anti_platlet	RAS_blocker	beta_blocker	statin
48.6667	0	0	45	1	5.05556	1	0	0	154	80	21.1073	4.3	186	202	1.43	0.54	10.6	18.95	349	59.696	1.02	0.91	0	0	1	0	0	1	0
40.6667	1	1	73	1	10.0667	0	0	1	112	56	17.6898	4.4	77	137	1.83	0.44	10.3	50.83	414	37.38	0.84	0.92	1	1	0	0	0	0	1
27.7333	0	0	82	0	9.51111	1	0	0	97	49	21.8787	3.8	119	139	1.64	0.48	11.3	46.94	583	49.098	0.99	0.87	2	1	0	0	0	0	1
42.0333	0	0	60	1	10.6528	0	1	0	195	104	19.4	3.9	98	118	1.76	0.47	9.3	172.61	77	62.176	1.12	1.14	0	0	0	0	0	0	0
48.6667	0	0	73	1	6.31111	1	0	0	82	48	22.1453	4.2	98	167	1.45	0.47	10.6	11.68	1153	42.958	0.56	0.63	3	1	0	0	1	1	0
69.2333	1	1	37	1	10.4028	1	0	1	196	103	23	3.7	164	189	1.95	0.58	11	115.92	249	28.148	1.12	1.08	0	0	1	1	0	0	0
48.6667	0	0	57	1	13.7722	0	1	0	216	119	21.9525	4.2	77	199	1.29	0.58	12.5	156.97	540	30.4	1.36	1.34	0	0	1	0	0	0	1
80.1667	0	0	46	0	12.6806	0	0	0	169	89	25.2	4.2	555	128	1.58	0.4	10.6	59.5	619	69.72	1.16	1.17	0	0	0	1	0	0	1
16.9667	1	1	88	0	1.58889	0	0	0	53	43	13.7357	3.1	135	145	#NULL!	0.5	9.2	62.93	314	30.59	0.579	0.41	3	1	0	1	0	0	0
80.1667	0	0	23	0	9.33889	0	0	0	94	54	22.4	4.4	108	152	1.68	0.37	9.1	37.59	601	51.732	1.07	0.95	0	0	0	0	1	0	1
29.4	1	0	69	0	17.4611	0	1	0	131	84	18.3143	3.7	282	192	1.84	0.56	12.8	11.81	453	22.794	0.65	0.74	3	1	1	1	0	0	1
80.1667	0	0	56	1	8.26389	0	0	1	203	97	23.3	4.3	47	175	1.8	0.49	11	475.85	410	100.6	1.08	1.11	0	0	0	0	0	0	0
80.1667	0	0	82	1	10.4	0	1	0	149	95	22	4.1	246	146	1.63	0.62	11.1	123.69	901	44.202	1.04	1.22	0	0	1	1	1	0	0
38.4667	0	0	62	0	2	1	0	0	150	75	25.3	3.9	90	166	1.72	0.47	10.4	62.98	386	53.018	0.6	0.57	3	1	0	0	0	0	0
70.7333	1	1	49	1	5.97222	0	1	1	183	111	27.6	4.2	272	185	1.69	0.52	11.2	187.45	700	61.344	1.2	1.2	0	0	1	0	0	0	0
20.9333	1	1	62	1	14.8389	1	1	1	125	59	20.7031	4.1	77	109	1.48	0.61	9.1	650.97	287	30.258	1.06	1.02	0	0	1	0	1	1	0
80.1667	0	0	74	1	1.08889	1	1	0	150	72	24.5	3.8	71	145	1.28	0.47	10.9	16.16	655	42.856	1.04	1.11	0	0	0	0	1	1	0
48.6667	0	0	73	1	5.38333	1	0	1	103	59	24.6097	4.1	143	223	1.54	0.64	12	84.17	534	45.57	0.55	0.85	3	1	1	0	0	0	0
48.6667	0	0	82	0	5.03333	1	0	0	90	64	21.7778	3.5	190	175	1.76	0.57	10.4	251.57	535	33.32	0.64	0.7	3	1	1	0	0	0	0
48.6667	0	0	74	0	20.2667	1	0	0	150	67	18.75	4.2	168	197	1.72	0.46	10.4	187.35	666	28.892	0.81	0.79	3	1	0	0	1	0	1
27.4667	1	1	53	1	18.4139	0	1	1	108	61	23.6652	3.9	121	154	1.42	0.41	12.4	142.03	1051	56.024	1.1	1.1	0	0	0	0	0	1	1
48.2	0	0	50	1	4.01667	1	0	0	83	58	19.1001	4.5	111	196	1.54	0.44	11.2	70.44	594	28.934	1.11	0.73	2	1	0	0	0	0	0
47.4333	1	0	48	0	16.0667	0	0	0	182	93	19.5	4.6	64	251	1.96	0.64	11.6	110.57	725	63.83	1.11	1.17	0	0	1	0	0	0	0
10.1667	1	1	58	0	16.9806	0	1	0	222	88	15.8169	3.8	50	141	1.79	0.64	9.4	181.26	663	41.41	1.18	1.2	0	0	1	1	0	0	0
13.9667	0	0	59	0	1.16389	0	1	0	192	100	16.7969	4.1	38	139	2.16	0.5	9.8	60.57	492	52.822	1.1	1.139	0	0	0	1	0	1	0
48.6667	0	0	47	0	20.1306	0	0	0	106	65	17.6898	4.5	226	248	1.92	0.4	10.8	480.63	1027	57.472	0.84	0.92	1	1	0	1	0	0	1
30.3667	1	1	68	0	10.2778	1	0	0	100	57	27.2	3.8	94	195	1.79	0.6	10.9	119.39	574	34.866	1.07	0.98	0	0	1	0	1	1	0
48.6667	0	0	70	0	20.0833	0	0	0	88	56	29.2969	3.9	194	125	1.54	0.51	11.8	1242.27	23	39.95	1.08	0.96	0	0	1	0	0	0	0
48.6667	0	0	68	0	4.88333	1	0	0	149	69	29.3333	4.7	194	293	1.52	0.52	11	86.19	443	35.568	0.94	0.97	0	0	1	0	0	0	0
48.6667	0	0	70	0	11.5889	0	0	0	163	72	19.1406	4.4	95	257	1.59	0.53	9	280.48	675	85.12	1.149	1.24	0	0	1	0	0	0	0
42.2	0	0	69	0	19.5583	0	0	0	169	88	22.2656	4.5	66	210	1.91	0.43	11.4	701.19	558	60.36	1.129	1.11	0	0	0	0	0	0	1
80.1667	0	0	79	0	3.275	1	1	0	138	76	24.2	4.1	186	129	1.78	0.55	10.1	65.46	895	26.94	0.54	0.54	3	1	1	1	0	0	0
80.1667	0	0	80	0	5.25833	1	0	0	132	74	20	4.2	495	175	1.71	0.58	10.7	257.95	504	45.54	1.1	0.95	0	0	1	0	1	0	0
48.6667	0	0	69	0	5.63056	0	0	0	125	75	26.8923	4.4	128	264	1.35	0.53	10.6	277.26	546	68.472	0.98	1.02	0	0	1	0	1	0	0
48.6667	0	0	61	0	15.5861	0	1	0	116	65	22.2063	4.6	109	182	1.77	0.41	11.6	159.58	640	73.788	0.94	1.08	0	0	0	0	0	0	0
48.6667	0	0	70	0	9.5	0	0	0	154	73	24.6094	4.3	176	274	1.54	0.48	10.1	218.36	626	40.744	1.12	1.09	0	0	0	0	0	0	0
48.3	1	1	72	0	20.2444	0	0	0	139	52	22.1893	4.1	369	145	1.83	0.58	10.7	697.03	710	55.332	1.07	1.149	0	0	1	0	0	0	0
43.1333	1	1	79	1	23.9722	0	0	0	130	72	23.5078	3.5	117	178	1.4	0.41	14.9	694.03	44	40.26	0.91	1.09	0	0	0	0	0	0	0
80.1667	0	0	56	1	8.21667	0	0	1	167	97	29.7	4.5	266	175	1.64	0.45	11.9	81.08	664	41.976	1.11	1.18	0	0	0	0	0	0	0
48.6667	0	0	60	0	20.4917	0	0	0	163	99	16.8802	4	72	174	2.12	0.45	11.5	454.57	593	59.73	1.05	1.07	0	0	0	0	0	0	1
48.6667	0	0	67	0	5.225	1	0	0	118	53	28.4444	3.9	103	185	1.72	0.59	9.5	221.93	648	49.5	1.03	0.91	0	0	1	0	0	0	0
48.6667	0	0	73	0	18.8528	0	0	0	123	74	21.2279	4	78	131	1.89	0.5	12	183.97	354	60.888	1.03	1.19	0	0	0	0	0	0	0
27	1	1	70	0	4.80278	1	0	0	155	73	15.8169	3.7	152	60	2.03	0.61	9	96.67	469	47.47	0.68	0.9	3	1	1	0	0	0	0
24.2333	1	1	60	0	16.4444	1	0	0	57	36	21.4844	3.6	146	174	2.24	0.5	10.3	637.46	667	50.49	0.59	0.61	3	1	0	0	0	0	0
46.2	0	0	27	1	3.85	0	0	0	169	99	28.7197	4.7	254	150	1.47	0.42	10	100.77	583	73.112	1.11	1.11	0	0	0	0	0	0	0
45.9333	1	1	61	0	13.2278	1	1	0	87	67	29.6	4.2	233	196	1.71	0.6	8.8	329.42	489	50.862	1	0.92	0	0	1	0	0	1	0
66.1333	1	1	80	0	12.6417	0	0	1	152	73	17.7	3.9	169	228	2.04	0.5	9.7	321.25	1094	51.392	1.02	1.17	0	0	0	0	0	0	0
79.2333	1	1	67	0	11.7083	0	1	0	184	72	20.2	4.5	51	179	1.97	0.56	10.5	348.07	754	62.042	1.2	1.23	0	0	1	1	1	0	1
48.6667	0	0	73	0	4.76111	1	1	0	171	80	22.2656	3.9	92	186	1.86	0.53	9.6	62.53	339	49.61	1.09	1.08	0	0	1	1	0	0	0
80.1667	0	0	55	1	13.2611	0	0	0	152	77	27.4	4.1	90	153	1.73	0.5	11	268.82	951	45.778	1.3	1.2	0	0	0	1	1	0	0
48.6667	0	0	62	0	6.55278	0	0	0	123	76	19.5312	4.5	75	234	1.63	0.5	9.2	310.47	636	58.968	0.72	0.95	1	1	0	0	0	0	0
48.6667	0	0	57	0	30.0056	0	1	0	118	72	23.8281	4.3	70	129	1.9	0.5	9.2	13.46	704	50.072	0.98	0.98	0	0	0	0	1	0	0
53.2	1	1	83	1	6.48889	0	0	0	132	71	24.1	4.2	87	190	1.77	0.45	10.8	51.94	522	35.096	1.19	0.77	2	1	0	0	1	0	0
80.1667	0	0	45	1	8.04444	0	0	0	197	116	19.3	4.8	175	226	1.88	0.45	10.8	1059.26	596	31.152	1.06	1.11	0	0	0	0	0	0	0
80.1667	0	0	51	0	6.39722	0	0	0	110	58	28	4.5	335	228	1.9	0.52	8.7	189.3	155	71.208	1.14	1.17	0	0	1	0	0	0	0
12.6	1	1	81	1	9.08056	0	0	1	113	78	21.6	4.1	121	128	1.53	0.43	11.2	272.97	1860	32.76	0.91	0.91	0	0	0	0	0	0	0
48.8667	1	1	72	0	8.24167	0	0	0	214	107	21.4	4.2	100	184	1.53	0.6	11.1	258.85	574	52.326	1.17	1.27	0	0	1	0	0	0	0
48.6667	0	0	56	0	16.2861	0	0	0	160	88	21.2306	4.3	99	172	1.85	0.46	9.9	508.92	483	47.094	1.25	1.1	0	0	0	0	0	0	0
59.6333	0	0	65	0	11.8806	1	0	0	141	78	20.8	4.2	354	179	1.76	0.38	11.8	19.15	756	24.024	0.67	0.59	3	1	0	0	1	1	0
80.1667	0	0	61	1	15.2694	0	0	0	112	61	19.8	4	64	126	1.59	0.47	10.5	106.76	875	36.864	0.95	0.98	0	0	0	0	0	0	0
20	1	0	95	0	3.00556	0	1	0	107	65	25.6837	3.7	62	184	1.8	0.52	10.1	67.96	541	44.838	0.81	0.86	3	1	1	1	0	1	0
48.6667	0	0	65	0	19.6861	0	0	0	138	67	24.9401	4	79	191	2.02	0.51	9.9	54.77	43	40.794	1.12	1.139	0	0	1	0	0	1	0
37.2333	1	1	67	1	3.66111	1	1	0	158	94	17.3	3.9	148	174	1.58	0.46	10.6	41.93	659	41.088	0.66	0.87	3	1	0	0	0	0	0
80.1667	0	0	65	0	4.31111	0	0	0	198	108	21.4	4.5	220	197	1.8	0.42	10.6	102.88	778	32.76	1.03	1.05	0	0	0	0	1	1	0
48.6667	0	0	58	0	19.2556	0	0	0	102	63	25.4375	4	105	147	1.6	0.51	9.8	246.79	603	44.352	1.12	0.95	0	0	1	0	0	0	0
80.1667	0	0	53	0	13.0639	0	0	0	153	89	19.8	4.5	101	190	1.72	0.47	11	39.17	899	47.008	1.19	1.19	0	0	0	0	1	0	1
27.6	1	1	88	0	5.60278	1	0	0	79	36	19.9219	3.3	132	185	1.82	0.63	10.5	93.94	748	45.36	0.49	0.55	3	1	1	1	1	0	1
48.6667	0	0	51	1	19.3861	0	0	1	166	92	26.398	4.7	950	295	1.59	0.42	11.7	459.6	602	45.18	1.149	1.12	0	0	0	0	0	0	1
80.1667	0	0	46	1	0.247222	1	0	1	138	84	27.1	5	296	139	1.42	0.47	9.6	19.53	404	64.384	1.07	0.97	0	0	0	0	0	0	0
19.1667	1	1	64	0	2.475	1	0	0	173	71	20.8	4.4	215	221	1.7	0.53	9.2	11.17	554	54.01	0.88	0.83	3	1	1	0	0	0	0
37.3	1	0	87	0	11.0778	1	0	0	99	61	31.1634	3.3	150	175	1.58	0.68	8.1	35.8	707	31.808	0.46	0.79	3	1	1	0	0	0	0
19.3333	1	1	83	1	2.52222	0	0	1	111	56	20.7031	4	167	119	1.83	0.44	10.8	49.98	559	39.672	0.93	0.87	2	1	0	0	0	0	1
48.6667	0	0	64	0	6.36667	0	0	0	147	81	31.4318	4.2	105	178	1.94	0.42	9.8	63.9	690	32.916	1.129	1.149	0	0	0	0	0	0	0
80.1667	0	0	31	0	6.25278	1	0	0	134	97	18.7	4.6	112	273	2.44	0.45	10.8	277.14	1230	44.3	0.96	1.03	0	0	0	0	0	0	1
80.1667	0	0	60	0	5.11111	0	0	0	144	65	19.8	4.5	344	164	2.04	0.47	11.7	99.46	630	52.864	0.99	1.17	0	0	0	0	0	0	0
60.3667	1	1	50	0	9.61111	0	0	0	184	109	24	3.8	138	166	1.94	0.54	8.4	287.63	613	42.018	1.15	1.16	0	0	1	0	0	0	0
80.1667	0	0	84	0	0.794444	0	0	0	160	77	22.5	3.9	44	200	1.9	0.5	10	169.12	599	33.972	1.29	1.2	0	0	0	0	1	0	0
63.7333	1	1	69	1	0.202778	1	1	1	139	78	26.4	3.8	57	155	1.49	0.55	8.2	56.14	489	33.078	0.86	0.83	3	1	1	0	0	0	0
80.1667	0	0	58	0	12.7694	0	0	0	116	58	20	4	114	182	2.06	0.55	10.7	655.08	844	53.144	0.82	0.87	3	1	1	1	0	1	0
48.6667	0	0	51	0	15.9361	0	0	1	140	86	21.7193	4.1	94	174	1.32	0.55	9.8	460.89	663	53.248	1.18	1.23	0	0	1	1	0	0	0
58.7	1	0	63	0	14.2278	0	0	0	152	74	17.8	4.3	77	217	1.98	0.41	14	69.03	255	26.202	1.04	1.09	0	0	0	0	1	0	0
48.6667	0	0	47	1	5.89167	0	0	0	159	88	22.1453	4.6	202	173	1.77	0.39	10.6	32.14	432	53.808	1.22	1.149	0	0	0	0	1	0	0
48.6667	0	0	68	1	4.77778	0	1	1	178	70	20.0288	4.6	63	171	1.43	0.52	10.6	162.29	541	23.296	1	1.12	0	0	1	0	0	0	1
48.6667	0	0	66	1	12.7944	0	0	0	165	75	19.3625	4.5	95	245	1.59	0.46	11.3	112.64	963	35.7	1.22	1.28	0	0	0	1	1	0	0
28.8667	1	1	64	1	2.49722	1	1	1	224	92	24.6	4.3	89	193	1.35	0.48	12.5	170	367	62.86	1.18	1.22	0	0	0	0	0	0	0
48.6667	0	0	61	1	6.21389	0	0	0	134	78	24.2215	4.1	187	203	1.61	0.42	10.4	94.39	510	36.712	0.99	1.08	0	0	0	1	0	1	0
80.1667	0	0	71	1	10.1556	0	0	0	177	82	19	4.8	48	214	1.87	0.55	10.4	82.46	702	53.64	0.97	1.13	0	0	1	0	0	0	1
80.1667	0	0	61	0	11.8194	0	0	0	112	62	24.4	4.7	372	238	1.78	0.51	9.6	234.2	916	54.208	1.07	1.1	0	0	1	0	0	0	0
48.6667	0	0	51	1	19.3361	0	0	0	171	76	21.2963	4	60	148	1.36	0.5	9.4	996.41	551	44.616	1.149	1.09	0	0	0	0	1	0	0
80.1667	0	0	34	0	12.6028	0	0	0	134	79	28.5	4.3	197	197	1.58	0.48	12.3	1226.85	515	63.104	1.06	1.08	0	0	0	0	1	1	0
80.1667	0	0	74	0	3.93889	0	0	0	125	66	22.2	4.3	117	149	1.62	0.44	11.3	41.12	778	56.7	1.06	1.16	0	0	0	0	0	0	1
23.4667	0	0	40	0	2.83611	0	0	0	174	98	16	4.8	68	198	1.68	0.45	11.1	140.14	607	47.736	1.05	1.01	0	0	0	1	0	0	1
26.5333	0	0	84	0	12.1806	0	1	0	148	88	17.5781	3.2	201	165	2.03	0.61	9.5	208.89	458	65.268	0.96	1.1	0	0	1	0	0	0	0
32.1	1	0	82	1	6.42222	0	0	0	212	101	27.1	4.3	74	138	1.55	0.53	10.6	287.58	566	52.128	1.27	1.24	0	0	1	0	0	0	0
32.1	1	1	81	1	9.83611	0	1	0	96	62	20.5499	4.5	120	154	1.74	0.53	12.5	195.16	817	36.936	1.05	0.83	2	1	1	0	0	0	0
80.1667	0	0	58	0	9.03889	0	0	0	96	58	22.1	4	73	227	1.66	0.42	9.3	86.05	1033	48.246	1.19	1.08	0	0	0	0	0	0	0
10.2667	0	0	78	0	9.25556	0	1	0	143	78	21.9	4	88	182	1.81	0.5	10.4	171.85	611	56.68	1.16	1.17	0	0	0	0	0	1	0
7.93333	1	1	74	0	15.7333	0	1	0	98	56	23.7253	3.9	129	126	1.72	0.61	6.9	624.96	433	57.536	0.69	1	1	1	1	1	0	0	0
48.6667	0	0	74	0	9.87222	0	0	0	154	88	18.7305	3.8	382	178	1.67	0.48	11	79.8	680	53.694	1.149	1.05	0	0	0	0	1	0	1
80.1667	0	0	62	1	8.89444	0	0	0	185	86	22.9	4.4	70	156	1.62	0.45	11.2	176.58	653	55.44	1.2	1.16	0	0	0	1	1	0	0
80.1667	0	0	56	1	12.4028	0	0	0	99	63	25.3	4.3	176	170	1.54	0.49	13.9	409.54	1221	54.432	1.12	0.97	0	0	0	0	0	1	0
80.1667	0	0	29	1	1.38056	1	0	0	179	105	30.7	4.7	275	164	1.58	0.4	16.5	43.81	759	37.036	1.16	1.14	0	0	0	0	0	0	0
48.6667	0	0	71	0	17.2472	0	0	0	171	73	21.4844	3.8	270	134	1.68	0.58	10.1	919.13	696	53.954	1.24	1.26	0	0	1	1	0	0	0
20.7333	0	0	82	0	6.09167	0	0	0	177	84	14.0202	4.6	55	197	2	0.53	10.3	65.65	735	40.016	1.12	1.27	0	0	1	0	0	0	0
80.1667	0	0	74	0	5.75833	0	0	0	121	67	24.1	4	123	213	1.65	0.51	11.1	193.93	668	56.916	1.04	0.9	2	1	1	0	0	0	0
63.4	0	0	52	1	8.575	0	0	1	158	90	22.8	4.4	204	149	1.77	0.45	9.3	161.91	460	40.162	1.16	1.18	0	0	0	1	0	0	1
39.0333	1	0	78	1	13.0194	0	1	0	143	77	27.9	4	84	106	1.35	0.56	10.4	99.15	551	40.568	0.99	1.07	0	0	1	0	1	1	0
26.7	1	1	77	1	12.3417	0	0	0	118	71	16	4.2	64	120	2.05	0.44	9.7	427.85	564	67.014	1.24	0.83	2	1	0	0	1	0	0
44.9667	1	1	58	0	6.28056	1	0	0	45	25	22.6562	4	202	180	1.33	#NULL!	8.2	74.35	218	39.92	0.69	0.31	3	1	#NULL!	0	0	0	0
48.6667	0	0	55	0	6.84167	1	0	0	153	86	35.1562	4.1	219	237	1.46	0.51	8.8	73.57	626	49.476	1.08	1.09	0	0	1	1	0	0	0
38.5667	0	0	75	0	12.0528	0	0	0	97	61	20.9	4.4	185	152	1.95	0.46	9.9	348.77	631	45.346	1.05	0.99	0	0	0	0	0	0	0
19.9	1	1	70	1	1.65833	1	0	0	104	49	24.2215	3.4	75	115	1.36	0.5	11.2	84.79	358	35.568	0.98	0.97	0	0	0	0	1	0	0
80.1667	0	0	62	1	2.825	1	0	0	178	95	26.9	4.2	150	158	1.54	0.52	10.2	49.68	1023	39.9	1.26	1.14	0	0	1	0	0	0	0
80.1667	0	0	63	0	5.10833	0	0	0	174	81	22.6	4.2	193	161	1.58	0.65	9.8	520.26	509	58.338	1.21	1.16	0	0	1	0	0	0	0
10.6667	1	1	72	0	13.5722	0	0	0	120	52	15.9	4.1	116	94	2.13	0.43	10.2	454.7	344	72.226	0.97	1.03	0	0	0	1	1	1	0
47.1333	0	0	66	0	3.92778	1	0	0	120	63	26.5625	4	142	114	1.66	0.46	10	213.69	517	44.3	0.99	0.96	0	0	0	0	0	0	0
48.6667	0	0	55	0	18.7917	0	0	0	84	42	21.4031	4.2	49	160	1.71	0.68	9.3	#NULL!	535	55.268	0.6	0.35	3	1	1	0	0	0	0
32.5333	1	1	76	1	17.4306	1	0	0	51	36	16.955	4.1	101	187	1.88	0.54	9	249.32	734	48.384	1.71	0.74	2	1	1	1	1	0	0
80.1667	0	0	87	1	10.4	0	0	0	164	88	19.4	4.5	140	201	1.52	0.54	10.4	73.89	611	37.31	1.16	1.15	0	0	1	0	0	0	1
48.6667	0	0	54	0	18.7722	0	1	0	208	91	20.6905	3.8	135	191	2.45	0.5	9.3	343.1	97	49.5	1.17	1.1	0	0	0	0	0	0	0
15.2	1	1	69	0	4.15556	0	0	0	175	83	17	4.5	54	189	1.85	0.57	11.1	55.37	529	67.032	1.08	1.14	0	0	1	0	0	1	0
80.1667	0	0	49	1	1.03889	1	0	1	217	109	22.7	4.8	64	159	1.48	0.51	9.4	91.04	512	46.31	1.11	1.17	0	0	1	0	0	0	0
26.0667	1	0	73	0	16.1389	1	0	0	113	84	17.9688	3.9	142	112	1.72	0.56	9.6	28.55	727	30.656	0.97	0.78	2	1	1	0	1	0	1
80.1667	0	0	47	0	10.75	0	0	0	119	77	21.3	4.4	107	196	1.76	0.33	10	451.26	576	66.196	1.13	1.14	0	0	0	0	1	0	0
48.6667	0	0	76	0	4.07222	0	0	0	181	89	25.5367	4	125	125	1.37	0.49	11.2	7.93	395.7	32.074	1.07	1.18	0	0	0	1	0	0	0
31.9	1	1	68	0	9.62222	0	0	0	173	97	23.1	4.3	91	157	1.99	0.61	10.5	692.92	851	66.232	1.09	1.07	0	0	1	0	0	0	0
80.1667	0	0	60	0	5.51944	0	0	0	164	84	20.3	4.7	127	243	1.47	0.56	9.6	50.07	758	56.54	1.13	1.18	0	0	1	1	0	0	0
33.6	1	1	58	0	12.0028	0	1	0	164	74	22.8	3.4	155	212	#NULL!	0.6	7.6	271.23	685	70.35	1.08	1.24	0	0	1	0	0	0	0
36.0667	1	1	78	1	8.53889	1	0	0	91	67	20.202	3.8	162	191	1.62	0.47	8.9	78.32	718	34.65	0.89	0.74	3	1	0	0	0	1	0
80.1667	0	0	44	1	11.5806	0	0	1	122	71	18.8	4.4	91	268	1.62	0.43	11.1	369.13	79	68.224	1.11	1.15	0	0	0	0	1	1	0
18.8667	1	0	62	1	4.88056	1	0	0	192	100	23	4.3	109	381	1.33	0.61	12	73.1	475	63.384	0.65	0.92	1	1	1	1	0	0	0
80.1667	0	0	71	0	11.5889	0	0	0	171	84	21.2	4.5	104	172	1.56	0.63	10.8	398.6	954	73.45	1.24	1.25	0	0	1	0	0	0	1
16.8667	0	0	61	1	5.73611	1	0	0	172	77	28.3	4.5	79	157	1.51	0.58	10.6	115.43	433	47.282	0.94	0.91	0	0	1	0	0	0	0
45.9	0	0	88	1	3.825	1	0	0	154	67	20.4152	3.9	126	130	1.64	0.56	10.6	52.68	637	50.064	0.99	1.05	0	0	1	0	1	0	0
80.1667	0	0	42	1	14.8806	0	0	0	167	92	21.8	4.5	77	196	1.63	0.4	12.6	1011.52	362	71.394	1.16	1.05	0	0	0	0	0	0	0
77.3333	1	1	73	0	11.8167	1	1	0	151	75	24	4.2	452	184	1.66	0.65	10.6	558.94	770	43.1	0.55	0.8	3	1	1	0	0	0	0
36.0333	1	1	61	1	5.28333	0	0	0	86	54	25	4.8	334	210	1.58	0.47	12.3	43.6	212	57.702	0.85	0.91	1	1	0	1	1	0	0
80.1667	0	0	46	0	9.71944	0	0	0	149	88	21.9	4.5	112	172	2.04	0.5	9.8	163.42	375	44.916	1.15	1.14	0	0	0	0	0	0	0
48.6667	0	0	67	1	4.25278	1	0	1	133	55	24.9108	2.9	189	143	#NULL!	#NULL!	9.2	42.07	360	26.7	0.83	0.88	3	1	#NULL!	0	0	0	1
48.6667	0	0	57	0	5.61389	0	0	0	165	91	23.1405	4.3	94	171	1.54	0.53	10	203.3	447.1	51.2959	1.12	1.12	0	0	1	1	1	0	0
12.2333	1	0	83	1	6.96944	0	1	0	139	84	23.8	3	262	107	1.51	0.63	10.3	100.92	463	29.46	0.65	0.58	3	1	1	0	0	0	0
47.4	0	0	48	1	3.95	0	0	1	170	91	24.8016	3.2	70	120	1.48	0.41	8.4	109.58	308	27.156	1.11	1.1	0	0	0	1	0	0	1
67.4333	0	0	63	0	8.575	0	0	0	169	76	31.5	3.8	183	231	1.58	0.59	9.7	76.01	577	58.112	1.13	1.15	0	0	1	0	1	1	0
25.0667	1	0	59	0	1.725	1	1	0	246	110	34.1	4.3	447	246	1.51	0.63	11.1	55.75	548	45.6	0.65	0.74	3	1	1	0	1	1	0
80.1667	0	0	43	0	11.5833	0	0	0	163	88	23	4	1257	227	1.63	0.43	6.9	1066.78	1298	84.448	1.18	1.12	0	0	0	0	1	0	0
48.6667	0	0	63	0	9.24722	0	1	0	183	74	20.0288	4.1	58	145	1.87	0.4	9.9	130.07	15355	40.04	1.12	1.17	0	0	0	0	0	0	0
19.3667	1	1	72	0	4.32222	1	1	0	43	32	24.8358	4.2	171	215	1.76	0.54	11.4	19.91	449	44.18	0.32	0.32	3	1	1	1	1	0	0
38.9333	1	1	61	1	3.81944	0	0	1	162	97	31.6	3.5	283	186	1.77	0.46	8.6	193.44	52	52.64	1.09	1.02	0	0	0	0	0	0	0
42.7667	1	0	77	0	11.4028	1	0	0	112	74	22.0604	3.7	131	139	1.58	0.52	10	662.07	337	33.04	0.84	0.82	3	1	1	0	0	0	0
80.1667	0	0	54	1	1.95833	0	0	1	198	103	21.4	4.3	15	195	1.75	0.4	9.9	233.7	702	41.216	1.06	1.07	0	0	0	0	0	0	0
48.6667	0	0	61	0	5.08333	1	1	1	99	42	31.25	4.2	164	141	1.55	0.56	10.2	22.64	736	47.216	1.08	1.04	0	0	1	1	1	0	0
24.6333	0	0	71	1	2.41667	0	1	1	124	80	18.6	4	282	163	1.68	0.48	9.8	38.53	777	39.904	0.77	0.73	3	1	0	0	0	0	0
35.6	1	0	58	1	3.23889	1	0	1	147	73	22.7732	3.8	48	119	1.3	0.32	8.9	87.43	1461	55.772	1.07	0.99	0	0	0	0	1	1	0
79.8	1	0	62	1	11.3944	1	0	1	126	74	24.6	4.1	294	186	1.48	0.47	12.6	55.18	16	39.474	0.92	1.02	0	0	0	0	0	0	0
35.5333	1	0	78	0	4.99444	1	1	0	55	45	16.6	4	131	204	2.14	0.58	11.4	30.51	620	45.6	0.68	0.44	3	1	1	0	1	1	1
75.7333	1	1	54	0	3.32222	1	0	0	162	90	27	4.4	132	175	1.46	0.49	10.7	39.53	838	47.136	1.16	1.12	0	0	0	0	0	0	1
30.2333	1	0	85	0	3.63056	0	1	0	131	62	28.5156	3.7	92	189	1.66	0.59	9.4	50.94	564	25.74	1.07	1.09	0	0	1	1	1	0	0
48.6667	0	0	68	1	4.90833	1	0	0	177	77	20.1956	4.3	146	162	1.5	0.47	10.5	259.98	388	44.252	1.159	1.21	0	0	0	1	0	1	0
80.1667	0	0	56	0	10.8389	0	0	0	155	87	20.4	4.1	63	156	2.08	0.43	10.7	341.29	973	63.24	1.15	1.13	0	0	0	0	1	0	0
48.6667	0	0	59	0	17.5194	0	0	0	145	84	19.1467	4.2	86	170	1.94	0.47	10.9	437.23	514	47.3	1.07	1.03	0	0	0	0	0	0	0
80.1667	0	0	75	0	10.5472	0	0	0	191	84	21.1	4.2	93	183	1.86	0.44	11.1	277.88	788	50.544	0.85	1.07	1	1	0	0	1	1	0
48.6667	0	0	59	0	4.79167	1	0	0	121	74	20.7031	4.8	112	165	1.41	0.46	10.8	160.06	508	60.634	0.87	0.93	1	1	0	0	1	0	0
80.1667	0	0	85	1	5.89722	0	1	0	190	91	18	4.1	65	104	1.51	0.44	9.8	187.56	586	21.892	1.16	1.14	0	0	0	0	1	0	0
9.2	1	0	56	1	4.76944	1	1	0	88	47	23.1834	4.3	114	178	1.42	0.61	10.1	95.05	658	46.284	0.68	0.7	3	1	1	0	0	0	0
28	1	1	73	0	7.41389	0	0	0	129	80	22.8	3.6	162	188	1.9	0.65	8.7	160.55	336	78.474	0.57	0.8	3	1	1	1	0	0	0
47.1333	1	1	66	0	9.21944	0	0	0	192	86	24.3	4.5	73	186	1.8	0.57	11.2	440.67	524	49.882	1.19	1.19	0	0	1	0	1	0	0
17.4	1	0	66	0	7.83333	0	0	0	123	70	23.4	3.8	73	199	1.71	0.46	7.9	37	854	30.272	1.07	1.15	0	0	0	1	0	0	0
9.46667	1	1	69	0	4.64444	1	0	0	82	51	22.2	3	143	108	2.23	0.44	8.9	245.66	711	46.002	1.01	1	0	0	0	0	0	0	1
36.8667	1	0	71	0	6.68611	0	0	0	131	100	24.8	4	75	206	1.81	0.54	10.1	252.11	853	61.016	0.51	0.77	3	1	1	0	0	0	1
44.3	0	0	70	0	3.69167	1	0	0	174	77	19.563	4.1	175	159	1.8	0.53	10.5	233.19	486	36.378	1.04	1.06	0	0	1	0	1	1	0
44.4667	0	0	29	1	3.70556	0	0	0	190	100	21.1073	4.9	91	162	1.34	0.42	10.4	72.2	515	48.944	1.47	1.28	0	0	0	0	0	0	1
80.1667	0	0	47	1	0.144444	0	0	1	184	99	18.6	4.2	57	135	1.42	0.53	11.2	63.56	435	69.362	1.15	1.16	0	0	1	0	1	0	1
8.4	1	0	71	1	4.27778	0	0	1	90	53	21.3382	3.8	45	124	1.47	0.54	10.6	75.31	655	63.104	1.01	1.02	0	0	1	0	0	0	0
43.8333	0	0	64	1	3.65278	1	0	0	141	70	17.0068	3.9	137	210	0.75	0.55	8.8	36.57	621	39.312	0.95	0.95	0	0	1	1	0	0	1
48.6667	0	0	67	0	32.3	0	1	0	102	60	20.3125	4.4	205	206	1.92	0.48	11.6	231.92	788	35.1	1.05	0.99	0	0	0	0	0	0	0
80.1667	0	0	54	0	10.9972	0	0	0	157	88	21.7	4.2	162	183	1.84	0.39	10.6	111.62	447	51	1.15	1.2	0	0	0	1	0	1	0
76.5333	0	0	79	1	1.23611	0	1	1	114	59	21.7	4.2	101	126	1.44	0.54	10.6	82.8	314	36.872	1.08	0.81	2	1	1	0	0	0	1
80.1667	0	0	48	0	5.84167	0	0	0	131	75	27.7	3.9	81	129	1.75	0.4	8.7	474.64	486	86.11	1.06	1.15	0	0	0	1	0	0	0
48.6667	0	0	69	0	17.5944	0	0	0	141	93	17.3484	4.3	119	180	2.02	0.51	9.7	34.55	718	28.196	1.159	1.1	0	0	1	0	0	1	1
80.1667	0	0	32	1	4.63056	0	0	0	210	99	24.2	4.5	71	160	1.84	0.57	9.3	51.23	376	80.1	1.21	1.24	0	0	1	1	0	1	1
80.1667	0	0	80	0	10.8861	0	0	0	59	44	23.2	4.3	116	169	1.61	0.54	9.8	151.48	553	51.06	0.89	0.49	3	1	1	0	0	0	0
18.9333	1	0	79	0	2.35833	0	0	0	160	67	18.8	3.7	63	103	2.01	0.65	8.5	30.45	751	25.272	1.05	0.79	2	1	1	0	0	1	0
48.6667	0	0	43	0	15.9139	0	1	0	109	63	23.3091	4.1	111	139	1.74	0.41	12.1	259.07	317	70.848	0.95	1.02	0	0	0	1	1	0	1
80.1667	0	0	58	0	10.8111	0	0	0	140	80	25.7	3.6	101	163	1.82	0.54	12	129.71	255	58.41	1.22	1.25	0	0	1	1	1	1	0
55.9333	0	0	75	0	10.3694	0	1	0	157	78	23	4.4	128	154	1.78	0.59	9.7	322.58	585	55.65	1.12	1.26	0	0	1	1	0	0	1
9	0	0	55	1	12.0694	1	1	1	160	92	24.093	3.8	387	184	1.61	0.51	12.3	50.03	615	31.434	0.84	0.81	3	1	1	0	0	0	0
38.1667	1	0	67	1	1.42222	0	0	0	122	59	25	4.3	153	191	1.48	0.52	10	98.82	781	52.704	0.97	1.03	0	0	1	0	1	0	0
80.1667	0	0	39	1	14.2528	0	0	1	167	84	22.8	4.3	97	112	1.4	0.67	8.8	957.47	561	47.628	1.16	1.14	0	0	1	0	1	0	0
40.3333	1	1	75	0	3.36111	1	1	0	161	80	22.6562	4.6	177	175	1.45	0.5	10.4	189.86	585	44.1	1.09	1.08	0	0	0	0	0	0	0
80.1667	0	0	68	0	6.61944	1	0	0	226	99	21.3	4.2	171	215	1.91	0.61	9.7	36.28	749	19.488	0.68	0.71	3	1	1	0	0	1	0
23.3	0	0	91	1	1.43056	1	1	0	146	79	22.5	3.5	266	158	1.55	0.51	9	65.21	4950	34.944	1.11	1.15	0	0	1	1	1	0	1
18.4667	0	0	53	1	4.30833	0	0	0	174	83	22.7583	4.7	67	162	1.45	0.65	11.9	153.66	828	72.48	1.1	1.12	0	0	1	1	0	1	0
48.6667	0	0	63	1	17.3056	0	0	0	172	77	20.5693	4.2	122	134	1.9	0.41	9.6	321.32	22	37.812	1.21	1.19	0	0	0	0	0	0	1
80.1667	0	0	53	0	8.22222	0	1	0	183	100	19.3	4.6	57	176	1.97	0.51	10.8	63.74	815	38.7	1.11	1.14	0	0	1	1	0	0	0
80.1667	0	0	59	1	8.62778	1	1	0	168	89	25.3	4.4	132	149	1.73	0.64	9.8	99.69	711	63.83	1.13	1.21	0	0	1	0	0	1	1
15.5333	1	1	67	1	2.24444	1	0	0	124	63	25.2	4.4	188	216	1.58	0.54	14.7	192	454	40.704	0.43	0.96	1	1	1	1	0	1	1
80.1667	0	0	48	0	10.5222	0	0	0	67	43	21.6	3.9	328	159	1.36	0.48	8.7	322.45	399	53.94	0.9	0.75	3	1	0	0	0	0	0
80.1667	0	0	57	1	10.4389	0	0	0	188	111	25.7	4.3	191	242	1.53	0.6	10.5	42.29	749	50.96	1.21	1.29	0	0	1	0	0	1	0
48.6667	0	0	73	0	6.3	1	0	0	112	49	27.2932	4.3	243	188	1.41	0.56	11.1	240.27	480	51.992	0.84	0.84	3	1	1	0	0	1	1
80.1667	0	0	69	1	1.75	0	0	1	164	92	28.2	4.6	129	212	1.34	0.55	11.3	79.28	472	35.89	1.2	1.21	0	0	1	1	0	1	0
27.9	1	1	70	1	14.4306	0	0	1	188	83	20.0692	4.2	119	135	1.8	0.53	9.6	196.46	429	42.712	1.129	1.129	0	0	1	0	0	0	0
20.8	1	1	52	1	2.52222	0	0	0	163	88	22	4.2	59	128	1.46	0.49	6.8	76.34	982	57.984	1.18	1.18	0	0	0	0	1	0	0
14	0	0	61	0	9.46667	0	0	0	143	74	21	4.4	211	166	#NULL!	0.5	9.7	294.48	726	57.228	0.91	1.13	0	0	0	0	1	0	0
74.5	1	1	76	1	0.211111	1	0	0	156	73	21.7	3.6	53	108	1.59	0.49	9.8	48.17	546	31.228	0.81	0.69	3	1	0	0	0	0	0
48.6667	0	0	83	1	4.31111	0	0	1	139	73	25.3444	3.8	138	184	1.17	0.53	10.1	213.77	11	31.12	1.149	1.19	0	0	1	1	0	1	0
80.1667	0	0	65	1	6.81944	1	0	1	236	115	17	4.1	73	241	1.93	0.46	10.5	27.71	602	46.648	1.14	1.12	0	0	0	1	0	0	0
80.1667	0	0	41	1	10.575	0	0	0	115	65	23.8	4.8	215	195	1.29	0.39	15.2	388.42	1390	52.432	0.95	1.12	0	0	0	0	0	1	1
48.6667	0	0	49	0	15.9417	0	0	0	162	81	18.9181	3.8	68	166	2.16	0.52	10	455.13	714	43.87	1.21	1.12	0	0	1	1	0	1	1
80.1667	0	0	73	1	8.90278	0	0	0	141	78	27.2	4.3	91	213	1.66	0.46	12	247.14	1133	50.386	1.24	1.18	0	0	0	1	1	0	0
41.9667	1	1	78	0	5.36389	0	1	0	174	85	21.7	4.2	408	256	1.65	0.56	10.6	147.69	870	35.904	1.23	1.26	0	0	1	1	1	0	0
48.6667	0	0	69	0	16.7583	0	0	0	137	76	20.8117	4.1	114	178	1.87	0.62	10.3	315.94	536	49.788	0.94	0.96	0	0	1	1	0	0	1
48.6667	0	0	48	0	10.9194	0	0	0	112	75	23.4375	4	82	238	1.87	0.38	9.2	87.07	118	51.632	1.129	1.04	0	0	0	0	0	0	0
80.1667	0	0	61	0	10.1472	0	0	0	105	77	19.9	4.1	113	223	2.16	0.48	9.6	631.95	863	63.074	1.03	0.93	0	0	0	0	1	0	0
27.9667	1	1	63	0	10.1306	1	0	1	81	25	20	4.1	239	170	1.8	0.47	11.5	90.95	644	62.592	0.88	0.49	3	1	0	1	0	1	1
43.3333	1	1	73	0	7.66111	0	0	0	126	51	28.125	3.6	276	176	1.55	0.53	8.9	750.04	1294	74.444	1.01	0.91	0	0	1	0	1	0	0
33.3333	0	0	63	0	16.4889	0	0	0	163	87	16.7969	4.3	96	144	1.87	0.49	10.4	276.7	92	31.968	1.159	1.07	0	0	0	0	1	0	1
73.4	1	0	77	1	0.327778	1	0	0	194	78	21.3	4.2	176	162	1.54	0.49	10.3	16.91	21	52.982	0.93	0.98	0	0	0	1	0	0	1
48.6667	0	0	56	0	6.39167	0	0	0	125	64	21.0938	4.6	63	158	1.69	0.5	10.5	70.17	652	43.522	1.22	1.23	0	0	0	0	0	0	0
18.1333	1	1	67	0	2.62778	1	1	0	125	51	22.3478	4.7	133	266	1.44	0.52	10.3	87.93	746	38.916	0.89	0.68	3	1	1	0	1	0	0
71.6667	1	1	69	0	0.952778	0	0	0	158	88	24.1	4.5	151	328	1.52	0.52	10.9	20.59	1056	31.08	1.05	1.1	0	0	1	1	0	1	1
80.1667	0	0	51	1	3.48056	0	0	0	194	114	21.9	4.3	43	195	1.82	0.42	10.3	82.16	613	44.626	1.21	1.22	0	0	0	0	1	0	0
48.6667	0	0	61	1	6.26944	1	0	0	204	95	29.7284	4.3	261	185	1.56	0.5	11.1	46.8	989	40.404	1.139	1.149	0	0	0	0	1	0	1
48.6667	0	0	53	1	10.5667	0	1	1	126	75	24.2215	4.5	118	195	1.48	0.58	9.9	732.39	505	47.532	1.07	1.03	0	0	1	0	0	0	0
80.1667	0	0	64	0	0.183333	1	0	0	151	71	26.2	4.2	115	171	1.72	0.5	10.2	35.42	306	54.84	0.57	0.5	3	1	0	1	0	1	0
80.1667	0	0	75	0	9.275	0	0	0	98	65	17.5	3.9	183	152	1.91	0.53	12	153.12	1100	34.704	1.02	1.03	0	0	1	0	0	0	1
80.1667	0	0	27	1	0.688889	1	0	0	151	88	27.9	4.6	114	102	1.52	0.47	10.9	77.73	593	30.94	1.15	1.18	0	0	0	1	0	0	0
70.2	0	0	70	0	9.08056	0	0	1	123	61	21.9	4.5	70	181	2.22	0.51	9.7	296.69	609	50.244	0.88	0.89	3	1	1	0	0	1	1
48.6667	0	0	72	0	7.21667	1	0	0	91	54	22.6562	3.5	85	110	1.94	0.53	9.4	34.94	691	50.274	0.94	0.84	2	1	1	1	0	0	0
80.1667	0	0	74	0	4.99722	0	0	0	141	72	25.8	4.1	189	195	1.84	0.5	10.6	52.65	732	33.972	1.09	1.19	0	0	0	0	0	1	1
79.5333	1	1	78	0	10.7361	0	0	0	169	97	22.3	4.2	72	197	1.78	0.6	10.9	417.6	661	60.146	1.11	1.12	0	0	1	0	0	0	0
48.6667	0	0	74	1	7.98611	0	1	0	126	77	21.4533	4.1	426	201	1.7	0.41	10.5	140.7	535	45.76	1.02	0.95	0	0	0	1	0	1	0
58.6333	0	0	84	0	9.43889	0	0	0	150	71	20.8	4.1	338	231	1.85	0.55	10.3	53.77	545	48.866	0.96	0.99	0	0	1	0	0	0	1
80.1667	0	0	38	1	9.72778	0	0	0	168	91	19.4	4.6	52	152	1.57	0.47	10.8	512.2	1111	58.24	1.21	1.2	0	0	0	1	0	0	0
80.1667	0	0	58	0	9.61111	0	0	0	123	76	24.1	4.4	158	252	1.79	0.41	10.8	112.25	663	51.04	1.27	1.24	0	0	0	0	0	1	1
48.6667	0	0	61	0	16.2917	0	0	0	142	90	24.4444	4.5	185	180	2.1	0.44	11.3	232.9	479	49.536	1.12	1.21	0	0	0	0	0	1	1
46.2667	0	0	49	0	3.85556	0	0	0	154	88	17.1875	4.4	133	175	1.88	0.41	9.5	144.36	367	44.46	1.06	1.1	0	0	0	0	0	0	0
48.6667	0	0	64	0	16.2611	0	1	0	83	59	19.313	3.9	83	161	1.67	0.44	10.5	222.08	528	72.352	1.46	0.91	0	0	0	0	0	0	0
80.1667	0	0	46	1	4.37778	0	0	0	162	86	21.1	3.9	318	156	1.49	0.44	8.8	134.21	779	33.384	1.07	1.27	0	0	0	0	0	1	0
30.7333	1	1	71	1	9.91389	0	0	1	99	54	27.3356	4.4	109	183	1.54	0.44	9.2	307.54	389	54.288	1.159	0.86	2	1	0	1	1	0	1
47	0	0	54	1	3.91667	1	1	1	125	73	29.737	4.3	124	171	1.25	0.45	10.2	77.69	481	43.956	1.09	1.03	0	0	0	1	1	1	0
32.6667	1	1	86	1	3.575	0	1	1	190	69	23	3.8	56	166	1.31	0.65	10.5	42.2	622	33.48	1.11	1.18	0	0	1	1	0	0	1
48.6667	0	0	76	1	4.08889	0	0	0	138	64	24.2215	3.5	187	150	1.65	0.63	9.8	70.17	247	27.434	1.02	1.06	0	0	1	0	0	0	0
48.6667	0	0	58	1	3.825	1	0	1	156	74	25.3155	4.3	187	225	1.57	0.43	10.1	114.34	519	31.006	1.05	0.93	0	0	0	1	0	1	1
80.1667	0	0	69	0	6.70833	1	0	0	108	59	26.7	4.1	878	252	1.93	0.54	8	452.2	1376	54.54	1.03	0.95	0	0	1	0	0	0	1
48.6667	0	0	69	1	15.6917	0	0	1	171	87	19.0311	3.9	53	148	1.76	0.52	9.9	51.45	637	33.32	1.139	1.159	0	0	1	1	0	0	0
20.8	1	1	83	1	8.58056	0	0	0	110	67	20	3.3	64	130	1.46	0.69	10.2	40.99	597	35.796	0.67	0.94	1	1	1	0	0	1	1
39.5333	1	1	66	0	9.50278	0	0	0	156	76	25.5	4.1	64	164	1.5	0.54	10.2	58.33	128	57.96	1.1	1.06	0	0	1	1	1	0	0
32.4333	1	1	66	1	9.5	1	0	0	171	91	24.4	4	100	211	1.5	0.63	10.4	347.64	849	55.44	0.8	0.87	3	1	1	1	0	1	0
24.1667	0	0	46	0	12.4333	0	0	0	163	86	17.4818	4.5	88	167	2.1	0.41	9.2	43.99	16	30.6	1.06	1.17	0	0	0	0	0	0	0
48.6667	0	0	59	0	15.7417	0	0	0	130	65	26.1719	3.8	67	192	1.67	0.47	9.7	48	27	37.012	1.09	1.11	0	0	0	0	0	1	0
80.1667	0	0	42	1	9.47222	0	1	0	175	103	22.5	4.5	74	155	1.53	0.4	14.3	83.8	134	58.804	1.27	1.25	0	0	0	1	1	0	1
48.6667	0	0	61	1	5.56111	1	0	0	150	57	18.75	4.8	83	192	1.39	0.53	11.3	21.72	173	50.176	1.06	1.04	0	0	1	1	1	1	0
80.1667	0	0	67	1	8.76667	0	0	1	137	67	19.1	4.4	92	168	1.54	0.52	9.6	22.14	644	42.722	1.05	1	0	0	1	1	0	0	1
23.3333	1	0	67	0	13.4806	0	0	0	168	61	18.75	4	105	165	1.71	0.53	10.1	433.95	597	72.964	1	1.17	0	0	1	0	0	0	0
80.1667	0	0	63	0	9.37222	0	1	0	203	108	18.8	4	74	166	1.84	0.55	9	391.76	736	51.168	1.29	1.27	0	0	1	1	0	0	0
80.1667	0	0	53	0	0.397222	0	0	0	112	62	24	4.4	54	133	1.59	0.46	11.7	81.64	608	60.858	1.1	1.13	0	0	0	0	0	1	1
80.1667	0	0	72	0	13.5944	0	0	0	129	71	23.2	4.1	105	169	1.77	0.45	10.2	449.6	429	87.552	1.15	1.11	0	0	0	1	1	0	0
80.1667	0	0	28	0	9.25	0	0	0	178	110	22.4	4.1	157	130	1.82	0.45	7.4	132.03	618	45.87	1.19	1.18	0	0	0	1	0	1	0
47.5667	1	1	75	1	0.669444	0	0	0	157	83	22.2	4.5	166	106	1.5	0.52	11.2	108.86	362	39.668	0.99	1.02	0	0	1	1	0	1	0
48.6667	0	0	56	1	13.2944	0	0	0	227	108	20.7612	3.9	43	150	1.39	0.47	9.5	447.19	651	48.752	1.17	1.23	0	0	0	0	0	0	1
80.1667	0	0	62	0	3.93611	0	0	0	173	83	22.2	4.7	80	144	1.67	0.68	10.6	42.19	571	56.52	1.2	1.23	0	0	1	1	0	0	0
48.6667	0	0	80	0	11.8778	0	0	0	104	59	22.0604	4.1	393	267	1.57	0.53	10.5	160.79	665	38.61	0.94	0.9	2	1	1	0	0	1	1
51.4	0	0	23	0	9.25278	0	0	0	174	109	19.7	4.7	63	142	1.96	0.54	11.1	60.46	538	54.08	1.13	1.15	0	0	1	1	0	1	1
80.1667	0	0	52	0	4.08333	0	0	0	192	94	20.5	4.4	82	217	1.65	0.45	10	113.97	727	40.8	1.09	1.14	0	0	0	0	0	0	0
13.5	1	1	71	1	2.48611	1	1	1	156	75	26.5731	4.1	151	140	1.27	0.48	9.8	77.86	1482	33.516	1.02	1.04	0	0	0	0	0	1	0
80.1667	0	0	68	0	9.01389	0	0	0	160	80	22.6	4.5	129	250	1.77	0.43	10.1	48.03	716	43.512	1.23	1.17	0	0	0	0	0	0	0
32.6	1	1	54	1	3.08889	1	0	1	138	78	19.5965	3.3	40	133	1.3	0.4	11	21.45	236	9.922	0.99	1.129	0	0	0	1	0	0	0
48.6667	0	0	44	1	8.67778	0	1	1	115	87	34.9388	4.4	546	183	1.11	0.46	13.1	475.44	258	64.752	0.97	0.97	0	0	0	0	0	1	1
52.0667	1	0	62	0	8.94167	0	1	0	168	102	22.2	4	116	148	1.98	0.48	9.6	36.65	603	40.656	1.2	1.22	0	0	0	1	1	0	0
48.6667	0	0	59	1	4.39444	1	0	0	191	93	25.5937	4.5	99	119	1.11	0.4	11.2	301.6	450	46.398	1.28	1.26	0	0	0	1	0	1	0
29.4667	0	0	74	0	4.68611	0	0	0	134	80	20	4.5	67	139	1.85	0.57	9.7	47.49	204	41.108	1.03	0.98	0	0	1	1	0	1	0
27.9333	0	0	70	0	8.85278	0	0	0	221	91	22.5	4.2	122	163	1.42	0.6	8.8	335.48	697	55.64	1.18	1.15	0	0	1	1	0	1	0
45.3667	0	0	66	0	3.78056	0	0	0	202	82	18.8271	4.1	115	154	1.79	0.44	11.3	65.87	1087	51.732	1.1	1.139	0	0	0	0	0	0	1
79.0667	1	1	75	1	4.38889	0	1	0	203	107	21.1	4.1	230	206	1.77	0.61	11.2	36.67	613	48.36	1.09	1.13	0	0	1	1	0	0	0
48.6	0	0	61	0	3.25556	1	1	0	161	85	26.7	4.2	206	212	1.9	0.52	8.1	73.26	631	35.49	0.58	0.48	3	1	1	0	0	1	1
48.6667	0	0	57	0	8.89444	0	0	0	206	92	17.1875	4.7	122	187	1.98	0.49	10.5	176.39	577	42.504	1.05	1.06	0	0	0	1	0	1	1
48.6667	0	0	56	1	7.40556	0	0	1	194	101	25.6489	4.7	211	176	1.52	0.41	10.6	24.34	678	42.24	1.18	1.2	0	0	0	0	0	0	0
54.5	1	1	64	0	18.7444	0	0	0	103	72	19.1	4.2	47	163	2.06	0.47	9.8	85.75	711	40.964	0.96	0.9	2	1	0	0	0	1	0
80.1667	0	0	46	1	8.62222	0	0	1	181	86	21.7	4.1	76	180	1.67	0.51	9.4	207.26	478	53.856	1.02	1.01	0	0	1	0	0	0	0
80.1667	0	0	48	0	3.34444	0	0	0	162	91	22.2	4.4	127	233	1.79	0.4	9.1	173.65	681	56.04	1.24	1.24	0	0	0	1	1	1	1
48.6667	0	0	56	0	9.09722	0	0	0	149	70	21.3333	4.5	77	173	1.97	0.5	10.1	250.42	764	51.516	1.02	1.149	0	0	0	0	0	0	0
26.3	1	1	65	0	18.0278	1	0	0	91	50	24.4444	3.6	119	185	1.89	0.59	8	245.59	1007	39.936	1.03	0.59	2	1	1	1	0	1	0
48.6667	0	0	77	1	11.8167	0	0	1	129	88	20.4152	4.4	229	239	1.61	0.47	11.8	354.07	79	60.97	0.99	0.91	0	0	0	0	0	0	1
80.1667	0	0	47	1	1.74444	1	1	1	199	99	25.1	4	229	212	1.47	0.43	10.9	40.94	613	71.448	1.26	1.24	0	0	0	1	0	0	0
80.1667	0	0	67	0	1.525	1	0	0	143	80	31.6	3	296	67	1.72	0.52	8.2	56.54	978	41.172	1.08	1.09	0	0	1	0	0	1	1
23.6667	1	1	58	1	8.46667	0	1	1	139	75	22	4.2	120	162	1.34	0.56	9.6	187.2	443	61.68	1.19	1.21	0	0	1	1	0	1	1
45.2333	1	1	51	0	11.7528	1	0	0	105	69	19.4771	4	112	242	1.92	0.61	10.1	175.67	739	58.776	0.77	0.66	3	1	1	0	0	0	1
20.8667	1	0	59	0	8.40278	1	1	0	167	120	26.6	3.7	195	138	1.6	0.55	9.1	144.67	545	47.136	1.14	0.93	0	0	1	1	0	1	0
48.6667	0	0	55	0	8.14722	1	0	0	111	65	31.2452	3.7	161	194	1.45	0.51	10.9	24.74	760	58.348	0.97	0.92	0	0	1	0	0	0	1
48.6667	0	0	50	0	11.8889	0	0	0	154	80	19.5965	4.2	163	264	1.42	0.53	5.9	409.19	92	30.912	1.31	1.24	0	0	1	1	0	0	0
65.4667	1	1	70	1	8.95	0	1	1	189	88	22.3	4.7	70	129	1.44	0.53	10.9	63.72	505	34.86	1.18	1.12	0	0	1	0	0	1	1
80.1667	0	0	46	0	7.98889	0	0	0	147	79	22	3.9	162	167	1.68	0.42	10.3	172.63	707	44.744	1.16	1.19	0	0	0	1	0	1	1
25.6	1	1	82	0	3.94722	1	0	0	161	66	20.3125	4.2	221	172	1.77	0.46	10.2	22.96	705	60.96	0.7	1	1	1	0	0	0	0	0
48.6667	0	0	48	0	14.5722	0	0	0	175	99	21.7778	4	52	183	2.29	0.44	9.7	223.77	663	66.264	1.07	1.08	0	0	0	0	0	1	0
80.1667	0	0	86	0	4.34444	0	0	0	138	67	15.5	3.9	268	222	#NULL!	0.5	10.2	112.51	903	54.534	0.98	0.86	2	1	0	0	0	0	0
48.6667	0	0	49	0	14.9417	0	0	0	195	102	19.1467	4.5	87	235	1.72	0.5	10.6	100.24	700	63.248	1.22	1.19	0	0	0	0	0	0	0
48.6667	0	0	57	0	5.675	1	0	0	124	62	20.8117	4.5	137	153	1.72	0.45	10	280.42	783	62.01	0.98	0.95	0	0	0	0	0	0	1
48.6667	0	0	67	1	10.1306	1	0	0	96	55	22.4059	3.3	85	153	1.68	0.57	9.4	53.08	587	26.4	1.05	0.79	2	1	1	0	1	0	1
80.1667	0	0	64	1	4.25833	0	0	0	227	105	18.3	4.5	53	162	1.39	0.59	9.3	126.04	524	40.48	1.22	1.21	0	0	1	1	0	0	0
48.6667	0	0	57	1	9.75278	0	0	0	156	97	21.875	4.5	428	250	1.8	0.63	11.1	378.3	894	43.65	1.159	1.129	0	0	1	0	0	1	0
15.7333	1	1	50	0	11.9861	0	1	0	58	44	20.8889	4.6	92	204	2.05	0.54	9.9	274.2	639	58.24	0.63	0.62	3	1	1	0	0	0	0
80.1667	0	0	46	0	20.0056	0	0	0	166	96	20.1	4	37	140	2	0.45	10.3	172.66	257	36.784	1.08	1.23	0	0	0	1	0	0	0
48.8	1	1	62	1	0.605556	1	1	0	156	86	17.2	3.7	46	129	1.54	0.4	11.3	6.62	494	29.808	0.99	1.11	0	0	0	0	0	0	0
15.1667	1	1	75	1	8	1	1	0	171	81	25.3	4.3	58	220	1.54	0.58	13.2	308	136	51.516	0.83	0.87	3	1	1	0	0	0	1
6.36667	0	0	49	1	0.530556	0	0	1	215	111	22.8625	4.2	89	127	1.21	0.43	9.9	186.03	720	58.824	1.18	1.23	0	0	0	1	0	0	0
48.6667	0	0	57	1	5.40556	1	0	0	141	74	34.8502	4.5	159	109	1.3	0.54	8.7	197.52	917	65.28	1.27	1.23	0	0	1	1	1	1	0
80.1667	0	0	64	0	7.43611	0	0	0	139	74	25	4.4	70	184	1.48	0.69	10	386.36	641	62.244	1.2	1.2	0	0	1	1	0	1	0
48.6667	0	0	61	1	6.38333	1	0	0	176	86	28.3737	4.2	234	170	1.63	0.5	10.4	16.59	135	53.46	1.139	1.18	0	0	0	0	0	0	1
80.1667	0	0	79	1	7.70278	0	0	1	143	67	25.3	4.2	113	182	1.58	0.47	10.6	48.4	729	46.376	1.16	1.21	0	0	0	1	0	0	0
80.1667	0	0	61	1	7.26389	0	0	0	169	90	24	4.9	352	227	1.74	0.51	13	208.33	776	47.136	1.23	1.22	0	0	1	0	0	1	1
48.6667	0	0	50	0	12.9	0	0	0	129	78	28.125	4.6	220	273	1.69	0.52	9.9	94.16	738	40.04	1.149	1.19	0	0	1	1	0	1	1
45.7667	1	1	77	1	8.975	1	0	0	54	37	27.6817	3.2	89	159	1.74	0.51	9.2	62.97	611	27.6	0.56	0.5	3	1	1	0	0	0	0
48.6667	0	0	74	1	14.25	0	0	1	141	74	24.5675	4.5	188	128	1.51	0.42	14.2	209.5	619	31.04	1.28	1.08	0	0	0	0	0	1	0
80.1667	0	0	65	0	7.71667	0	0	0	193	105	26	4.4	104	196	1.52	0.55	11	49.21	653	47.094	1.17	1.15	0	0	1	1	0	0	0
80.1667	0	0	61	0	4.62222	0	0	0	161	86	26.2	4.7	159	162	1.9	0.6	9.5	436.57	661	67.84	0.84	0.84	3	1	1	0	0	1	1
80.1667	0	0	47	1	5.73889	1	0	1	162	93	20.8	3.6	140	170	1.86	0.4	10.3	43.48	293	43.776	1.09	1.07	0	0	0	1	0	1	1
55.8333	1	1	65	0	6.97778	1	0	0	142	74	23.1	4.3	187	248	1.77	0.43	11	57.19	730	46.342	0.57	0.47	3	1	0	0	0	0	0
80.1667	0	0	38	1	7.25	0	0	0	128	71	21.6	4.7	97	152	1.56	0.42	12.2	656.34	612	55.014	1.12	1.1	0	0	0	1	0	1	0
58.1667	0	0	65	1	1.32778	1	0	1	147	87	23.8	4.4	336	291	1.39	0.49	10.7	288	614	38.592	0.81	0.95	1	1	0	1	0	1	0
80.1667	0	0	65	1	2.63056	1	0	1	184	93	28.5	4.9	210	189	1.47	0.44	11.4	24.6	867	42.144	1.23	1.13	0	0	0	0	0	0	1
48.6667	0	0	40	1	6.51667	0	0	1	170	103	25.2595	4.2	457	228	1.63	0.42	10.9	89.94	594	24.24	1.07	1.05	0	0	0	1	0	0	0
38.2333	1	1	69	0	10.7944	1	0	0	99	56	22.2222	4.2	178	233	1.77	0.57	10.8	65.17	700	49.8	0.77	0.68	3	1	1	0	0	1	1
80.1667	0	0	58	0	7.64722	0	0	0	121	64	27.2	4.5	138	130	1.56	0.46	11	184.7	533	55.388	1.13	1.12	0	0	0	1	0	1	1
20.4667	1	1	67	1	7.82778	1	0	0	95	61	23.939	4.3	133	200	1.58	0.64	12.6	146.44	678	42.768	0.81	0.68	3	1	1	0	0	0	0
80.1667	0	0	46	1	5.96944	0	0	1	198	108	24.9	4.4	150	125	1.55	0.52	12.9	283.38	507	64.728	1.26	1.27	0	0	1	0	0	1	0
80.1667	0	0	71	1	6.53889	1	0	0	190	68	26	3.9	108	148	1.53	0.51	10.6	105.04	384	49.932	0.93	0.45	2	1	1	1	0	1	1
48.6667	0	0	67	0	9.24722	0	1	0	240	102	24.3496	4	162	219	1.24	0.54	9.6	251.21	630	84.846	0.84	1.12	1	1	1	1	0	1	0
69.1667	1	1	54	1	6.92222	0	0	0	166	101	23.3	4.7	178	200	1.65	0.45	11.1	183.03	592	60.96	1.15	1.19	0	0	0	0	0	0	1
44	1	1	50	0	6.46667	0	0	0	137	84	17.7	4	369	211	1.79	0.54	9.1	437.89	601	60.3	0.94	0.98	0	0	1	1	0	0	0
48.6667	0	0	62	1	4.23333	0	0	0	173	90	23.8281	4.2	145	130	1.45	#NULL!	9.9	130.67	626	33.728	1.25	1.26	0	0	#NULL!	0	0	1	1
41.7	0	0	68	0	1.53333	0	0	0	172	85	21.6	4.3	191	197	2.06	0.58	9.7	202.58	586	51.296	1.02	0.73	2	1	1	1	0	1	1
42.9667	0	0	44	1	3.58056	0	0	0	204	122	19.8413	4.3	78	150	1.67	0.38	10	31.21	410	34.44	1.2	1.139	0	0	0	0	0	0	0
24.9333	1	1	41	1	11.6028	0	0	1	187	102	28.0664	3.3	40	117	1.41	0.52	7.4	181.17	607	52.4	1.32	1.35	0	0	1	0	0	1	0
80.1667	0	0	45	0	5.57778	0	0	0	136	86	17.4	4.1	72	143	1.78	0.4	10.6	265.97	1047	40.05	1.11	1.13	0	0	0	0	0	0	0
80.1667	0	0	34	1	5.24444	0	0	0	168	95	21.7	4.9	66	160	1.57	0.49	11.1	161.64	544	45.262	1.23	1.15	0	0	0	1	1	1	1
25.1333	1	0	63	0	11.4944	0	1	0	180	104	23.74	4.1	125	255	2.05	0.61	10	190.76	660	39.92	1.129	1.149	0	0	1	0	0	0	0
80.1667	0	0	68	0	0.366667	1	0	0	195	74	24.2	4.1	130	134	1.72	0.52	10.1	9.78	414	44.064	1.07	1.05	0	0	1	1	0	0	0
48.6667	0	0	63	0	4.90833	0	0	0	196	108	17.5146	4.2	53	141	1.96	0.48	11.5	145.14	342	37.224	1.3	1.33	0	0	0	0	0	1	0
12.8667	1	1	66	1	6.63056	0	0	0	103	66	26.8	3.7	148	233	1.65	0.66	14.2	198.96	884	75.544	0.72	1.01	1	1	1	0	0	0	0
36.7333	0	0	68	0	3.06111	0	1	0	93	52	24.2188	4.3	309	190	1.49	0.51	7.3	209.11	1201	48.262	1.07	1.04	0	0	1	1	0	0	0
48.6667	0	0	55	1	12.8139	0	0	0	128	82	22.4913	4.2	109	118	1.45	0.36	15.3	160.45	118	47.488	1.19	1.1	0	0	0	0	0	0	0
80.1667	0	0	28	1	6.5	0	0	1	205	127	21.3	4.9	128	129	1.36	0.4	15.2	100.35	40	63.14	1.15	1.17	0	0	0	0	0	0	1
48.6667	0	0	44	1	6.375	0	0	0	193	99	25.9516	4.9	163	175	1.56	0.52	11.1	339.77	639	73.698	1.12	1.24	0	0	1	1	0	0	0
48.6667	0	0	52	1	13.0639	0	0	0	189	103	22.9481	4.5	161	175	1.5	0.43	11	141.59	614	54.392	1.129	1.21	0	0	0	1	1	1	0
80.1667	0	0	34	1	5.71389	0	0	0	138	67	29	4.8	235	161	1.51	0.47	11	109.76	610	33.288	1.15	1.15	0	0	0	1	0	1	0
48.6667	0	0	65	0	4.91944	0	0	0	167	79	24.974	4.4	182	229	1.76	0.41	11.3	31.29	506	33	1.06	1.06	0	0	0	0	0	0	1
28.1333	1	1	71	0	4.6	0	0	0	141	67	21.4903	4.1	122	141	1.54	0.51	10.6	329.22	616	34.51	1.11	1.149	0	0	1	1	0	0	0
33.0333	1	0	80	1	5.61389	0	0	1	152	69	22.6562	3.8	122	125	1.47	0.43	10.3	150.89	860	43.488	1.01	1.05	0	0	0	0	0	1	1
42.9	1	0	58	1	5.41389	1	1	0	156	83	19.0311	4.1	112	227	1.26	0.53	11.7	303.89	163	37.312	1.149	1.2	0	0	1	0	0	0	1
11.2	1	1	74	1	1.30278	0	0	1	132	81	18.7	4.4	52	225	1.61	0.45	10	17.16	474	44.616	1.17	1.02	0	0	0	1	0	0	0
80.1667	0	0	72	1	4.225	1	0	0	180	82	27.3	3.9	167	167	1.66	0.52	10.1	27.33	681	49.184	1.15	1.12	0	0	1	0	0	1	1
48.6667	0	0	42	1	12.7222	0	0	1	134	75	24.2215	4.4	375	137	1.55	0.6	11.6	283.95	553	61.696	1.19	1.18	0	0	1	1	0	1	1
48.6667	0	0	67	1	12.7	0	0	0	169	78	20.7967	4.3	69	163	1.59	0.51	10.1	323.48	634	46.216	1.11	1.129	0	0	1	0	0	0	1
80.1667	0	0	20	1	5.95556	0	0	0	107	65	21.7	4	123	158	1.64	0.37	11.7	589.4	737	64.998	0.92	0.99	0	0	0	1	0	1	0
48.6667	0	0	56	0	4.94722	1	0	0	233	105	17.7096	4.6	111	123	1.77	0.48	10.7	172.28	544	53.76	1.09	1.22	0	0	0	0	0	0	1
48.6667	0	0	49	0	11.95	0	0	0	67	35	21.0938	4	106	142	1.82	0.46	9.4	1016.78	623	81.224	0.88	0.88	3	1	0	1	0	0	0
48.6667	0	0	71	0	4.9	0	0	0	119	70	23.3377	4.1	113	125	1.69	0.5	8.7	55.8	590	37.59	0.79	0.77	3	1	0	0	0	1	1
53.4	1	1	53	1	0.175	1	1	0	156	78	29.7	4	164	142	1.25	0.53	13	7.98	395	41.496	1.12	1.1	0	0	1	1	0	1	1
80.1667	0	0	66	0	3.46944	0	0	0	140	80	25.8	4.4	73	180	2.09	0.55	10.6	196.42	838	54.47	1.09	1.09	0	0	1	0	0	0	0
19.2	0	0	57	0	6.85	1	0	0	158	71	38.2653	4.1	315	250	1.5	0.49	11.2	964.1	416	85.656	1.129	1.22	0	0	0	0	0	1	0
45.9	1	0	83	0	5.79167	0	1	0	117	67	28.1	4.2	68	126	1.73	0.49	11.5	94.87	706	47.212	0.72	0.61	3	1	0	0	0	0	0
48.6667	0	0	40	1	5.06389	1	0	1	142	84	19.7232	4.4	252	199	1.66	0.43	10.1	146.43	738	37.544	1.07	1.04	0	0	0	0	0	0	0
80.1667	0	0	86	0	5.50833	0	0	0	87	73	26	4.1	136	160	2.06	0.57	10.3	194.64	572	46.75	1.05	1.06	0	0	1	0	0	0	0
43.6333	0	0	68	0	4.74444	0	1	0	156	59	19.9	4.1	91	173	1.85	0.49	9.6	59.59	457	47.712	1.14	1.17	0	0	0	1	0	0	0
80.1667	0	0	42	1	5.17222	0	0	0	186	110	25.9	4.5	74	172	1.93	0.44	14	66.83	503	44.408	1.08	1.08	0	0	0	0	0	0	0
48.6667	0	0	59	0	5.49444	1	0	0	188	68	25.2363	4.3	426	186	1.61	0.51	9.5	268.67	1068	40.426	1.129	1.9	0	0	1	0	0	0	1
80.1667	0	0	55	1	5.51944	0	1	1	107	64	26.1	4.7	270	228	1.54	0.56	9.7	200.04	600	57.346	0.84	0.94	1	1	1	1	0	0	0
44.0667	0	0	56	1	5.44444	0	0	0	207	101	19	4.3	45	174	1.38	0.5	9.2	47.67	35	68.672	1.15	1.19	0	0	0	1	1	1	0
38.6667	1	1	54	1	7.95278	1	0	0	102	65	24.6094	3.7	86	167	1.48	0.65	9.7	337.73	349	46.516	0.75	0.62	3	1	1	1	0	1	0
47.5	0	0	63	0	1.72778	1	0	0	146	75	29.3	4.1	125	174	1.69	0.6	9.9	20.44	311	47.042	1.19	0.86	2	1	1	0	0	0	1
8.3	0	0	62	1	7.26944	0	0	1	197	97	25.2595	4	72	182	1.46	0.48	10.7	515.65	414	53.312	1.19	1.17	0	0	0	1	0	0	0
48.6667	0	0	83	0	7.50556	0	1	0	100	55	26.4381	4.3	151	128	1.75	0.53	10	27.49	648	35.446	0.68	0.8	3	1	1	0	0	1	1
80.1667	0	0	74	0	1.54444	1	0	0	120	66	23.7	4.4	183	127	1.89	0.49	9.4	11.46	689	69.6	1.07	1.04	0	0	0	0	0	0	1
27.7667	1	1	57	1	3.49722	1	0	1	129	85	18.7328	3.9	111	176	1.41	0.56	8.199	54.27	483	51.184	0.91	0.99	0	0	1	1	0	0	0
80.1667	0	0	60	1	4.45833	0	1	1	157	85	23.1	4.6	82	176	1.58	0.5	16.9	228.7	200	83.126	1.19	1.18	0	0	0	0	0	1	1
48.6667	0	0	54	0	10.9556	1	1	0	156	98	28.3531	3.7	90	79	1.58	0.54	10.6	240.2	588	58.072	1.04	0.93	0	0	1	1	0	1	1
48.6667	0	0	51	0	9.03333	1	1	0	127	56	21.875	3.9	236	274	1.58	0.49	8.2	13.55	599	41.52	0.79	0.91	1	1	0	0	0	1	0
13.8	1	1	73	0	6.21667	0	1	0	39	30	17.5781	3.6	63	170	1.49	0.57	10.1	98.03	702	37.818	0.54	0.39	3	1	1	0	1	0	1
37.0667	0	0	50	0	4.20833	0	0	0	151	83	24.4	4.2	60	218	1.62	0.44	9	377.39	524	84.328	1.05	1.17	0	0	0	0	0	0	0
80.1667	0	0	54	1	4.21944	0	1	0	163	95	23.9	3.8	94	223	1.5	0.43	15.8	267.92	961	50.93	1.22	1.23	0	0	0	1	0	0	0
48.6667	0	0	27	1	10.8306	0	0	0	154	78	21.4692	4.6	142	127	1.54	0.34	11	82.6	622	51.04	1.09	1.05	0	0	0	0	0	1	1
48.6667	0	0	67	1	6.49444	1	0	0	139	78	22.6562	4.6	134	188	1.62	0.63	14.1	44.43	61	32.76	1.129	1.149	0	0	1	1	0	1	1
12.9	1	1	80	1	4.11111	0	0	1	114	68	26.1	3.4	121	158	1.65	0.52	10.4	136.01	294	49.39	0.89	0.98	1	1	1	0	0	1	0
28.8333	0	0	52	1	3.04167	1	0	1	106	68	22.7	3.9	201	198	1.71	0.6	10.7	29.66	668	43.68	0.92	1.1	0	0	1	0	1	0	1
27.4333	1	0	84	0	8.64444	0	0	0	123	64	20.3954	4.3	147	163	1.62	0.49	11.5	89.48	627	35.856	0.82	0.78	3	1	0	0	0	1	1
80.1667	0	0	59	1	0.161111	0	0	0	158	85	18.8	4.6	189	232	1.2	0.45	11.6	358.79	1082	49.996	1.04	1.14	0	0	0	1	0	1	1
19.5	0	0	56	1	2.10833	0	0	0	162	89	27.7	4.2	65	157	1.52	0.58	9.8	20.48	325	54.67	1.17	1.27	0	0	1	0	0	1	0
48.6667	0	0	61	0	6.03611	0	0	0	145	84	17.6048	4.2	64	152	2.14	0.43	10.1	74.26	993	44.804	0.97	0.98	0	0	0	0	1	0	1
48	0	0	61	0	4	0	1	1	162	82	33.4252	4.4	449	233	1.19	0.52	9.6	4.9	48	44.73	1.05	1.03	0	0	1	0	0	0	0
37.9333	1	1	60	0	5.45556	0	1	0	127	71	26.5625	3.5	96	170	1.76	0.57	11	385.32	644	61.548	0.97	0.95	0	0	1	1	0	0	0
28.2	0	0	52	1	6.53889	1	0	0	136	71	30.1038	4.7	92	164	1.41	0.53	9	119.16	596	58.94	1.23	1.09	0	0	1	0	0	1	1
48.6667	0	0	76	1	6.78333	0	0	0	118	55	25.2092	4.2	96	165	1.57	0.55	10.1	78.15	783	46.512	1.139	1.129	0	0	1	0	1	0	1
7.36667	0	0	74	1	3.18611	0	0	0	222	101	19.052	4.3	43	173	1.39	0.49	10.4	54.24	999	29.964	1.17	1.25	0	0	0	0	1	1	0
80.1667	0	0	74	1	2.30833	1	0	1	111	67	23	4.3	171	134	1.7	0.45	10.4	20.96	782	53.56	0.92	0.89	2	1	0	0	0	1	1
80.1667	0	0	49	0	2.11111	0	0	0	206	105	26.3	4.2	653	262	1.75	0.5	9.3	117.22	732	47.124	0.87	0.96	1	1	0	1	0	1	1
48.6667	0	0	75	1	6.81667	1	0	0	166	69	20.3125	4.6	96	118	1.64	0.64	9.2	280.64	964	39.312	1.05	1.09	0	0	1	0	0	1	0
80.1667	0	0	52	0	2.35833	0	0	0	241	116	16.4	4.3	37	190	1.86	0.66	10.8	168.88	556	55.44	1.14	1.14	0	0	1	0	1	0	1
33.3667	1	0	65	0	1.25833	0	0	0	116	71	25.6	4.1	355	159	1.79	0.48	10.9	82.78	1112	40.8	0.86	0.87	3	1	0	0	0	0	0
48.6667	0	0	77	1	7.36667	0	0	0	152	83	25.711	4.3	219	179	1.71	0.47	10	53.39	546	42.672	1.21	1.17	0	0	0	1	0	0	0
48.6667	0	0	55	0	6.81667	0	0	0	184	100	18.026	4.2	96	161	2.17	0.53	8.7	551.16	672	63.24	1.17	1.149	0	0	1	0	0	1	1
47.3667	0	0	62	0	3.94722	1	0	0	52	41	23.0681	3.8	79	119	2.18	0.54	9.6	1.29	953	53.768	0.42	0.45	3	1	1	0	0	0	0
48.6667	0	0	50	1	7.46111	1	0	0	154	79	20.4152	4.5	229	200	1.55	0.4	11.9	127.09	670	72.576	1.26	1.18	0	0	0	0	1	1	0
39.7	1	1	82	1	5.05	1	1	0	184	80	23.03	4.2	82	130	1.45	0.62	9.2	67.37	26	37.41	0.87	1.29	1	1	1	0	0	1	1
46.1667	0	0	49	1	3.84722	1	0	1	139	88	21.4533	4.6	132	184	1.59	0.43	9.6	51.54	1070	39.69	1.08	0.91	0	0	0	1	0	1	1
48.6667	0	0	56	0	5.90833	0	0	0	171	88	19.8178	4.3	51	158	1.85	0.41	10	19.8	756	49.83	1.09	1.07	0	0	0	0	0	1	0
48.6667	0	0	68	0	8.81667	0	0	0	157	77	25.3902	3.9	153	168	1.57	0.6	10.2	119.81	298	11.814	1.07	1.05	0	0	1	0	1	0	1
48.6667	0	0	68	0	8.65	1	0	0	143	75	24.0346	4.1	69	161	1.46	0.59	10.8	332.72	545	48.042	1.149	1.22	0	0	1	0	0	0	0
80.1667	0	0	53	0	1.19444	0	0	1	172	89	18	4.3	49	178	2.24	0.47	10.7	13.97	691	72.864	1.13	1.13	0	0	0	1	0	0	0
80.1667	0	0	56	1	1.61389	1	0	1	223	115	24.5	4.8	110	134	1.43	0.42	12.4	36.83	617	56.826	0.85	1.09	1	1	0	0	0	1	1
80.1667	0	0	48	1	16.6528	0	0	0	156	96	25.3	4.6	183	180	1.42	0.48	11.5	145.66	382	29.172	1.12	1.15	0	0	0	0	0	1	0
39.0667	1	1	71	0	1.29444	0	0	0	105	53	28.2	4.7	61	196	1.7	0.49	10.7	29.15	1153	40.46	1.03	1.02	0	0	0	0	0	0	0
48.6667	0	0	58	0	8.21667	0	0	0	108	65	22.8624	4.3	75	155	1.77	0.48	10.6	522.97	748	67.44	0.85	1.149	1	1	0	1	0	0	0
10.5667	0	0	62	1	3.43611	0	0	0	155	79	19.9481	3.8	133	169	#NULL!	0.44	11.1	299.42	458	43.142	1.18	1.22	0	0	0	0	0	1	1
80.1667	0	0	52	1	0.791667	0	0	0	173	95	28.1	4.7	81	148	1.31	0.57	11.6	145.67	359	34.086	1.16	1.18	0	0	1	0	0	0	0
47.9667	0	0	47	1	3.99722	0	0	1	195	89	21.8724	4.6	231	160	1.54	0.49	10.7	23.56	416	40.744	1.139	1.11	0	0	0	1	0	0	0
47.4333	0	0	37	0	3.95278	0	0	0	1546	103	27.968	4.3	178	132	1.17	0.46	8.9	92.77	323	66.588	1.1	1.02	0	0	0	0	0	1	1
51.8333	0	0	38	1	1.18333	1	0	1	106	68	26.2	3.3	46	90	#NULL!	0.39	8.2	39.01	1084	20.748	1.01	0.92	0	0	0	0	0	1	0
16.3333	1	1	59	0	1.675	1	0	0	145	55	28.8889	3.6	114	89	1.54	0.6	8.4	48.85	730	25.928	0.91	0.94	0	0	1	1	1	0	0
10.9333	0	0	46	0	2.15278	1	0	0	192	83	40.7908	3.8	172	154	1.56	0.6	8.1	306.05	469	48.688	0.84	0.84	3	1	1	1	0	0	0
37.2333	0	0	59	1	5.01389	1	1	1	176	93	24.8163	4.5	94	158	1.47	0.53	10.5	57.1	331	48.856	1.29	1.2	0	0	1	0	0	0	0
48.3333	0	0	48	1	4.02778	0	0	0	126	69	19.9573	3.7	33	109	1.27	0.48	11.1	64.34	604	17.32	1.129	1.33	0	0	0	0	0	0	1
46.5333	0	0	38	1	3.87778	0	0	1	183	105	22.1003	4.6	64	169	1.67	0.49	10.3	194.2	628	38.916	1.08	1.08	0	0	0	1	0	0	0
80.1667	0	0	76	0	0.302778	1	1	0	205	92	19	4.1	237	218	1.87	0.48	9.8	147.8	469	47.488	1.12	1.12	0	0	0	1	1	1	0
48.6667	0	0	52	0	6.92222	1	0	0	181	75	20.83	4.3	154	162	1.78	0.53	9.2	42.66	716	44.736	1.149	1.159	0	0	1	1	0	1	0
41.8667	1	1	55	0	5.41389	1	1	0	85	60	22.4813	3.3	339	239	1.81	0.47	10.6	79.86	382	20.47	0.6	0.66	3	1	0	0	0	0	1
48.6667	0	0	49	1	5.94722	1	0	1	181	97	19.5918	4.2	390	163	1.6	0.48	11.7	107.66	572	31.98	1.08	1.19	0	0	0	1	0	0	0
46.5667	0	0	39	1	3.88056	0	0	1	215	133	26.9274	4.5	98	175	1.19	0.45	11.5	81.99	584	61.77	1.12	1.149	0	0	0	0	0	1	1
22.3	0	0	74	1	2.63889	1	1	0	88	55	20.8117	3.5	139	218	1.59	0.39	9.9	109.67	1031	65.45	0.63	0.76	3	1	0	0	0	0	1
48.6667	0	0	55	0	5.83889	0	0	0	153	90	21.7778	4.1	110	186	1.63	0.52	11.8	135.05	537	35.112	1.2	1.19	0	0	1	1	0	0	0
8.2	1	0	65	1	2.43333	1	0	0	185	86	27.2392	4	118	145	1.42	0.49	12.9	182.38	478	36.624	1.1	1.18	0	0	0	0	0	0	0
19.0333	1	0	47	1	3.08056	1	0	1	224	101	22.5827	3.2	59	116	1.22	0.53	7.7	63.39	182	35.022	1.25	1.28	0	0	1	1	0	0	0
48.6667	0	0	52	1	5.02778	1	0	1	185	82	21.4533	4.5	227	148	1.29	0.49	12.4	20.89	734	19.624	1.21	1.22	0	0	0	0	0	0	0
9.36667	0	0	57	0	1.05833	1	0	0	30	24	24.974	4	125	193	1.37	0.35	10.3	106.72	66	45.12	0.73	0.36	3	1	0	0	0	0	1
48.6667	0	0	48	1	4.50556	1	0	0	213	96	20.7612	4.1	82	266	1.13	0.44	10.3	83.35	74	71.568	1.39	1.25	0	0	0	1	0	0	0
48.6667	0	0	67	1	4.93611	1	0	0	142	75	21.5139	4.7	134	139	1.68	0.43	10.3	10.56	401	47.432	0.95	0.92	0	0	0	1	1	1	0
43.5	0	0	67	1	3.625	1	0	1	186	85	20.4152	4	100	110	1.33	0.4	9.5	23.38	317	34.056	1.149	1.19	0	0	0	1	0	1	0
48.6667	0	0	47	1	4.91667	0	0	0	125	75	19.0311	4.3	109	171	1.75	0.43	9.9	138.65	325.5	36.96	1.07	1.139	0	0	0	0	0	0	1
48.6667	0	0	44	0	4.63611	0	0	0	122	57	26.7094	4.1	118	144	1.5	0.39	9.6	433.85	441	40.18	0.98	1.01	0	0	0	1	0	0	0
46.1	0	0	71	0	3.84167	0	1	0	173	94	21.3593	3.9	78	129	2.44	0.48	9.8	129.25	586	50.26	1.139	1.17	0	0	0	0	0	1	1
9.53333	0	0	54	1	0.794444	0	1	1	168	93	24.8016	4.1	58	167	1.32	0.5	10.4	48.06	403	46.98	1.23	1.17	0	0	0	0	0	0	1
45.9667	0	0	75	0	3.83056	0	0	0	125	74	17.6898	4.1	32	138	1.88	0.4	10.6	66.37	950	48.7	0.98	0.98	0	0	0	1	0	0	0
21.6333	0	0	56	1	1.80278	0	0	0	130	77	20.898	4.6	790	277	1.37	0.42	11.1	93.63	253	56.32	0.88	0.99	1	1	0	0	0	0	1
80.1667	0	0	74	1	12.5944	0	1	1	121	65	25.6	4.5	308	136	1.3	0.48	14.1	348.85	202	34.71	0.94	0.87	2	1	0	1	0	0	0
80.1667	0	0	56	1	11.6667	0	0	1	147	84	27.4	4.4	136	142	1.57	0.52	13.7	244.03	500	60.066	1.28	1.2	0	0	1	0	0	0	1
